# Supplementary material for: Adherence influencing factors – a systematic review of systematic reviews
Source: PubMed Central journal article supplement (PMC4323150; doi:10.1186/2049-3258-72-37), 2014-10-27

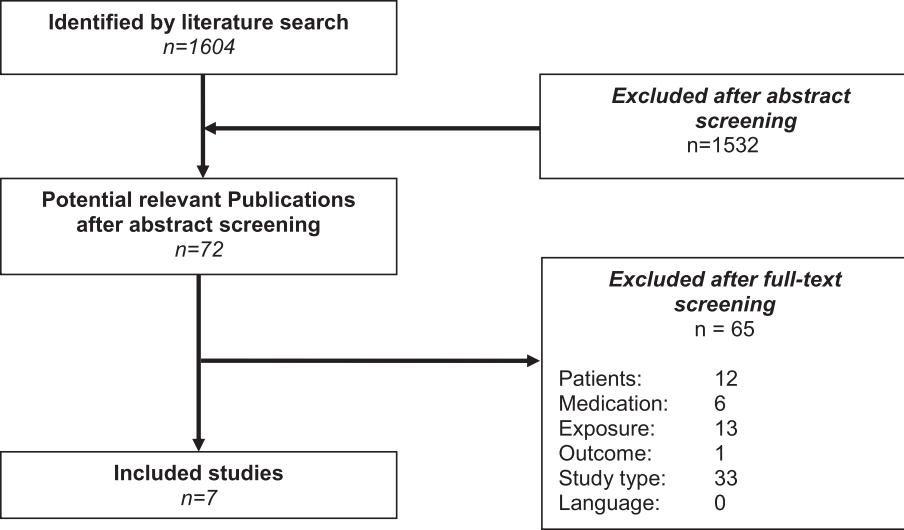

Supplement: 13690_2014_5053_MOESM3_ESM.pdf [file 13690_2014_5053_MOESM3_ESM.pdf]
